# Supplementary material for: Development of glacial lakes and evaluation of related outbursthazard at Adygine glacier complex, Northern Tien Shan
Source: Copernicus journal article supplement (doi:10.5194/esurf-2018-21), 2018-04-20
Supplement: Supplementary file [file esurf-2018-21-RC1-supplement.pdf]

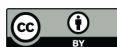

# Development of glacial lakes and evaluation of related outburst hazard at Adygine glacier complex, Northern Tien Shan

Kristyna Falatkova<sup>1</sup>, Miroslav Šobr<sup>1</sup>, Bohumír Janský<sup>1</sup>, Anton Neuroiter<sup>2</sup>, Wolfgang Schöner<sup>3</sup>

<sup>1</sup> Department of Physical Geography and Geoecology, Charles University, 128 43 Prague, Czechia

<sup>2</sup> ZAMG, 1190 Vienna, Austria

<sup>3</sup> Department of Geography and Regional Science, University of Graz, 8010 Graz, Austria

Correspondence to: Kristyna Falatkova (falatkok@natur.cuni.cz)

**Abstract.** Formation and development of glacial lakes in mountain regions is one of the consequences of glacier recession. Such lakes may drain partially or completely when the stability of their dam is disturbed. We presented a case study from Central-Asian mountain range of Tien Shan, a north-oriented tributary valley Adygine, where a glacier retreat resulted in formation of several generations of lakes. The aim of this study was to analyse past development of different types of glacial lakes influenced by the same glacier, to project site's future development, and to evaluate the hazard of individual lakes with an outlook for expected future change. We addressed the problem with a combination of methods namely bathymetric, geodetic, and geophysical on-site survey, satellite image and DEM analysis, and modelling of glacier runoff evolution. Based on the case of glacial lakes of varied age and type, we demonstrate the significance of glacier ice in lake's development. Lake 3, which is in contact with glacier terminus, has changed rapidly over the last decade, expanding both in area and depth and increasing its volume more than 13 times (7 800 m<sup>3</sup> to 106 000 m<sup>3</sup>). Hydrological connections and routing of glacier meltwater proved to be an important factor as well, since most lakes in the region are drained by subsurface channels. Within the hazard evaluation of lakes, we highlighted the importance of field data which can provide crucial information on lake stability. In our case, the understanding of site's hydrological system and its regime helped to categorise Lake 2 into low outburst hazard, while Lake 1 and Lake 3 were labelled as medium hazard lakes. Further development of the site will be driven mainly by rising air temperature and increasingly negative glacier mass balance. All three scenarios predict a significant glacier area decrease by 2050, specifically leaving 73.2 % (A1B), 62.3 % (A2), and 55.6 % (B1) of the 2012 glacier extent. The glacier retreat will be accompanied by changes in glacier runoff with first peak expected around the year 2020.

## 1 Introduction

Glacial lakes can be seen as gems gleaming in the harsh mountain environment. However, at the same time, they can pose a serious threat to downstream settlements and infrastructure. If we focus on Asian mountain ranges, the now common term GLOF (glacial lake outburst flood), first used for the Himalayan region, is ubiquitous. Mainly due to the development of satellite-based sensor technologies, the areas under scrutiny of investigators have increased from the Himalayas (Benn et al., 2012; Fujita et al., 2009; Shrestha et al., 2010) and Karakoram (Chen et al., 2010; Haemmig et al., 2014) to the Tibetan Plateau

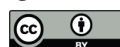

(Liu et al., 2014; Wang et al., 2013; Zhang et al., 2017), Pamir (Mergili and Schneider, 2011), and Tien Shan (Bolch et al., 2011; Engel et al., 2012; Narama et al., 2017; Sorg et al., 2012). In the territory of Kyrgyzstan, there are about 2 000 glacial lakes ( $>1\,000\text{ m}^2$ ), almost 20 % of them are potentially dangerous, and approximately 15-20 lakes are at risk of sudden drainage each year (Erokhin and Zaginaev, 2016). However, the dry and glacier meltwater-dependent region of Central Asia remains rather in the background of interest.

Some glacial lakes form and drain within a relatively short time (Erokhin et al., 2017). Others exist for years and decades without major change, and lastly, there are lakes in a phase of enlargement. Expansion of glacial lakes broadly correlates with warming temperature trends and negative glacier mass balance patterns (Lei et al., 2012; Mergili et al., 2013; Zhao et al., 2015). In addition, a recent study shows that the expansion of glacial lakes within a dry continental climate regime can be closely related to degradation of permafrost as well (Li et al., 2014). This means that lakes enlarge when in contact with a retreating glacier tongue, by melting of ice in the lake basin bed or sides, or by filling due to increased inflow from a glacier. Other factors playing a role in lake evolution include: erosion of surface drainage channel, formation, expansion or blockage of subsurface drainage channels, dam morphology changes, or slope movements adjacent to the lake.

Outbursts of mountain lakes occur almost annually in Kyrgyzstan (in recent years, these were Lake Merzbacher - 2017, Lake Chelektor - 2017, and Aksai - 2015). Given the increasingly intensive use of mountain valleys, greater losses can be expected as a consequence (Dussaillant et al., 2010). With all the processes accompanying glacier retreat (slope instabilities, melting of interstitial and buried ice, debuitressing effect, higher meltwater input), a lake becomes increasingly unstable. Once an outburst is triggered, a flood (often evolving into hyperconcentrated flow or debris flow) threatens areas in the lower parts of a valley. A procedure for dealing with this hazard includes: i) identification of potentially dangerous lakes, ii) detailed evaluation of the hazard, and iii) application of mitigating measures. Our study includes the second step: a detailed hazard evaluation, and tries to set a new path. As needs for field data in a hazard assessment has been expressed repeatedly, we present an assessment based on combination of on-the-spot and remotely-gained data.

Based on a detailed study of one particular site, we look at the issue of a glacier development and the associated actively evolving glacier forefield, and its consequences on lower lying areas. To address the problem of rapidly changing conditions in mountain regions, we incorporate the perspectives for the future development of the site and related outburst hazard into our study. The structure of this paper expresses our intention to promote more complex approach to the issue. We analyse the past development of the site, following both glacier and the proglacial lakes, then we look at the expected future conditions at the site, and finally we evaluate the lakes' outburst hazard and estimate how it can evolve with changing conditions. In our opinion, to analyse glacier retreat and lakes' formation without touching the topic of consequences (present and those in near future) is as incomplete as evaluating outburst hazard without knowing the past evolution of the site.

Although the study site is not particularly suited for the purpose of glacier retreat monitoring alone, in terms of observing the site in a more complex way, we find it very appropriate. The glacier is considered to be representative of smaller glaciers,



which are subjected to relatively fast retreat rates (Narama et al., 2010) and have a generally shorter response time to changes of climatic conditions compared to larger ones (Wang et al., 2014). This allows us to follow a larger development period in a smaller time scale. Also the existence of glacial lakes documenting glacier shrinkage is convenient – they are at various stages of development and could help us to better understand the evolution of different types of lakes. Due to the occurrence of lake outbursts in the region, high elevation of the site, and its proximity to densely populated areas, a hazard assessment strategy with estimate of future change is desirable.

The particular objectives of this study include: i) to analyse past evolution of different types of glacial lakes influenced by the same glacier, ii) to provide an insight into probable future evolution of the site, and iii) to evaluate hazard of individual lakes with an outlook for possible future change.

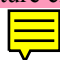

## 2 Methods

### 2.1 Study area

The research site is situated in Northern Tien Shan, specifically Kyrgyz Ala-Too, i.e. one of the outer regions. The highest peak of the East-West-directed range is Pik Semenova Tianshanskogo 4 895 m a.s.l. Although the Kyrgyz Ala-Too is not as highly glaciated as Central Tien Shan, the now glacier-free parts of the valleys show signs of former glacier extent. The main Ala Archa Valley currently has approximately 33 km<sup>2</sup> of its area covered by glaciers, and is drained into the Chuy River, which is part of a large endorheic basin. The most common lake type of Kyrgyz Ala-Too is a lake formed in an intramorainic depression (Table 1). Statistics show that 83.6 % of potentially dangerous lakes are categorised in ‘‘cored moraine-dammed’’ group, which includes intramorainic and thermokarst lakes with presence of buried ice (S. Erokhin, unpublished data).

Development of glaciation in the Ala Archa basin is monitored in the long term mainly due to its position in proximity of the Kyrgyz capital, Bishkek, and the popularity of the valley among tourists visiting the National Park. According to Aizen et al. (2007a), there was a reduction of glaciated area in the Ala Archa watershed by 5.1 % between 1943 and 1977 and 10.6 % between 1977 and 2003. The overall reduction of glaciated area over 60 years was 15.7 %, which is an above-average value – in Tien Shan, the glacier area shrank by 14.2 % (Aizen et al., 2007a). Farinotti et al. (2015) confirm this trend and Bolch (2015) points out that, although the number of glaciers increased due to disintegration of several glaciers, the total glacierised area was reduced by 18.3±5.0 % between 1964 and 2010. Rising air temperatures (especially since the 1970s) have caused a negative mass balance of most glaciers, which has also led to changes in the hydrological regime of glacial streams (Aizen et al., 1996; Glazirin, 1996; Pieczonka et al., 2013).

The Adygine glacier complex (42°30’10’’ N, 74°26’20’’ E) closes an 8-km long tributary valley with northern orientation and reaches an elevation of 3 400–4 200 m a.s.l. The upper part of the Adygine Valley contains large amounts of loose glaciofluvial sediments and is dominated by several generations of moraines up to a distance of 3.5 km from the current glacier terminus.

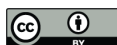

Table 1. Number and share of glacial lake types in Kyrgyz Ala-Too, Northern Tien Shan. Thermokarst lakes are included in intramorainic type, cirque lakes are represented by rockstep lake type. Only lakes with minimum area of 1 500 m<sup>2</sup> were categorised. Based on satellite image analysis and in consultation with S. Erokhin.

| Lake type                | Number and share |              |
|--------------------------|------------------|--------------|
| Moraine-dammed           | 13               | 14.5 %       |
| Intramorainic depression | 48               | 53.3 %       |
| Rockstep (+ moraine)     | 17               | 18.9 %       |
| Landslide dam            | 8                | 8.9 %        |
| Ice dam                  | 4                | 4.4 %        |
| Surface drainage         | 21               | 23.3 %       |
| Subsurface drainage      | 69               | 76.7 %       |
| <b>Total</b>             | <b>90</b>        | <b>100 %</b> |

10

Climatic conditions in the area are continental, characterised by relatively low precipitation and high annual and daily air temperature fluctuation. This is clearly evident at the Ala Archa station (2 200 m a.s.l.) which reports a 22 °C difference between mean air temperature (MAT) of the warmest and coldest months (Jul 13 °C, Jan -9° C) and mean annual precipitation totals of 450 mm. Some 1 500 m higher, at the Adyngine glacier, the MAT for January drops to -22 °C and reaches 5 °C in July; precipitation is estimated at 700-800 mm. On the northern slope of Kyrgyz Ala-Too, winters are characterised by low precipitation totals, whereas the maximum is typically reached in late spring and the beginning of summer. Sporadic permafrost occurs at elevations above 2 700 m a.s.l., discontinuous at 3 200–3 500 m a.s.l., and continuous above 3 500 m a.s.l. (Gorbunov et al., 1996). The Adyngine watershed has an area of 39.6 km<sup>2</sup> and elevation difference of 2 370 m. Its glacierised area constitutes about 10 % of the basin (3.9 km<sup>2</sup>). The valley below Adyngine glacier has an average slope of 10.8 °.

15

20

The glacier complex involves a polythermal glacier (2.8 km<sup>2</sup>) and a three-level cascade of glacial lakes that have evolved as a consequence of glacier retreat in the past 50 years (Fig. 1). The glacier terminus is currently situated at 3 600 m a.s.l.; the tongue is rather steep and short, emerging from a relatively flat, larger source area. A large part of the glacier is covered with a thin layer of dust and debris, considerably lowering the albedo of its surface. The position of equilibrium line altitude (ELA) on the northern slopes of Kyrgyz Ala-Too is at approx. 3 900 m a.s.l., resulting in an ablation zone covering more than 65 % of the glacier area. The lakes found at the site (Table 2) are of varying age and have different positions in the connected hydrological system draining meltwater down the valley. The most recently formed lakes are close to the glacier terminus, reacting to changes in glacier melt rates sensitively and redistributing the water further downstream, either by surface or subsurface channels. The middle level is represented by the largest lake of the site, Lake 2 (32 000 m<sup>2</sup>), with a fairly stable annual hydrological regime (Falatkova et al., 2014) supplying water to the lowest part of the cascade, Lake 1. Not being a permanent lake, this intramorainic depression is filled with water only during an ablation season when the rate of incoming meltwater is higher than the capacity of its subsurface drainage.

25

30



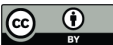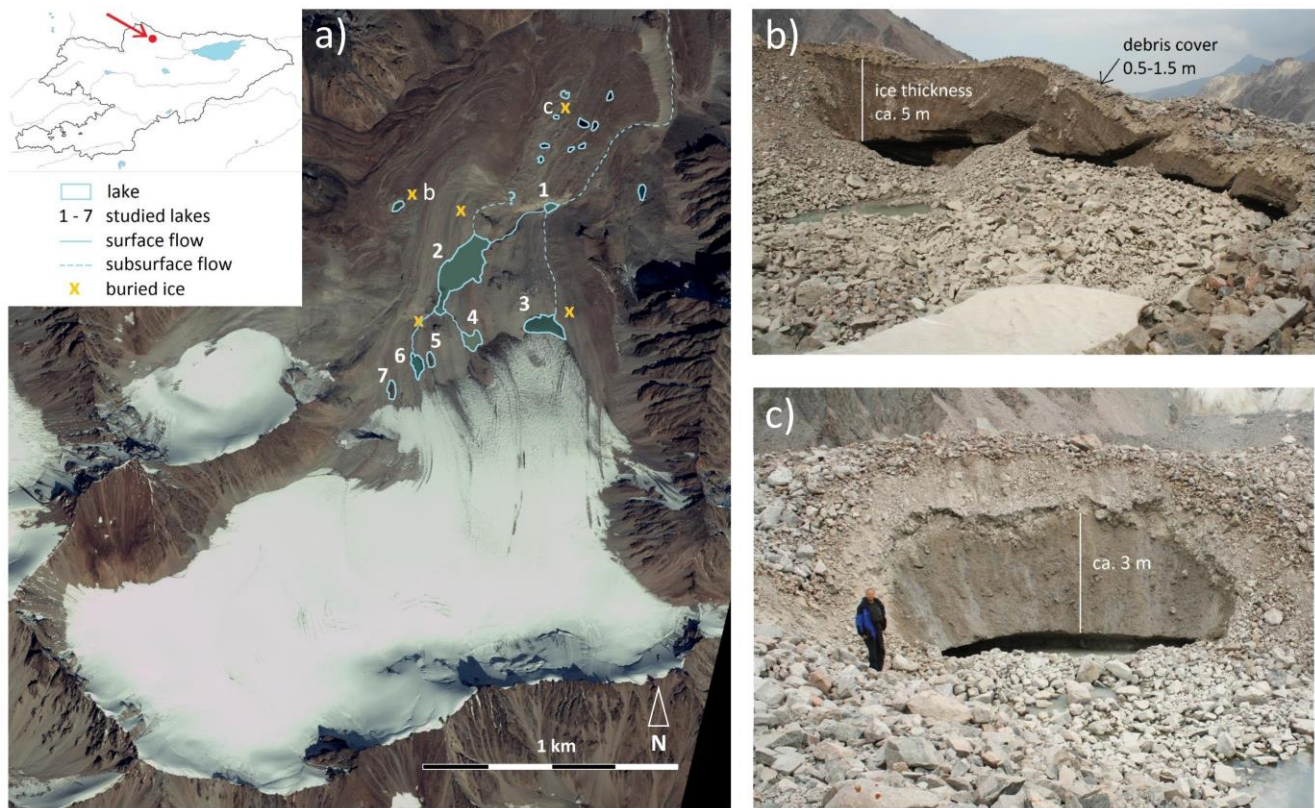

Figure 1. Overview of the Adygine glacier complex (a) and its recent dynamics – exposure of buried ice (b, c). The position of b and c spots is marked in figure 1a. Image source: Worldview-2, 2011, photo: K. Falatkova (2017)

5 Table 2. Basic parameters of the three largest lakes at the site.

| Lake | Max volume [m <sup>3</sup> ] | Max depth [m] | Elevation [m a.s.l.] | Dam type                 | Freeboard [m] | Buried ice | Drainage             |
|------|------------------------------|---------------|----------------------|--------------------------|---------------|------------|----------------------|
| 1    | 15 000 (200 000)*            | 5             | 3 450                | intramorainic depression | -             | yes        | subsurface           |
| 2    | 210 000                      | 22            | 3 540                | riegel + moraine         | 0 - 2.6       | yes        | surface + subsurface |
| 3    | 106 000                      | 14            | 3 580                | riegel + moraine         | 0 - 1         | yes        | subsurface**         |

\* potential volume of the lake in case of a drainage blocking

\*\* during high water level dam overflow observed, water sinks under surface after approx. 5 m

## 2.2 Field mapping

10 A research station built at the site provides an adequate background for field measurements. Climatic data and ground temperatures are obtained from an automated weather station situated near the Adygine glacier at 3 560 m a.s.l. The



hydrological regime of the lakes is monitored due to pressure sensors installed in Lake 1 (2012-2015), Lake 2 (2007-2017), and Lake 3 (2012-2017). The devices record the lakes' water level which, together with a bathymetric map of a basin, provide information on detained water volume changes.

5 The glacier retreat has been monitored since 2006 during the ablation season, by means of a geodetic survey carried out with a Leica TCR 705 total station. The survey was focused solely on the terminal part of the tongue, where the retreat is most significant and may result in exposure of overdeepenings (potential future lakes). The series is supplemented with glacier limits acquired from aerial images taken in 1988 and 1962. The lakes' shoreline changes are measured by the same means as the glacier terminus. To capture changes of lake basins and derive the volume of detained water, a repeated bathymetric survey was carried out at selected lakes (Sobr and Jansky, 2016). The depth was recorded in a 2.5 m step at defined profiles, using an  
10 echo-sounder mounted on a boat. We processed the data obtained and interpolated them into a bathymetric map.

We commenced to measure ablation at the terminal part of the glacier in 2007, when ablation stakes were installed in two transversal profiles. In the following year and in 2012, the stakes were surveyed and the position difference calculated. The selected key locations of the site (surroundings of the lakes and their dams) were surveyed by electrical resistivity tomography and spontaneous polarisation, in order to detect buried glacier remnants and possible seepage routes. In order to acquire  
15 information on glacier thickness and bed topography for adjusting the model of future glacier extent and identifying potential areas for lake formation, ground penetrating radar (GPR) was used along the central longitudinal profile, at 5 transverse, and 3 short connecting profiles.

### 2.3 Modelling of glacier evolution

20 The glacier mass balance model GERM (glacier evolution runoff model) applied in this study is based on a sophisticated degree-day approach (Hock, 1999; Huss et al., 2008). The future glacier mass balances until 2050 is calculated with GERM, forced by empirically downscaled scenarios data for daily air temperature and precipitation. Despite generally low data availability in Central Asia, daily air temperature means and precipitation totals were gathered from 2 stations near investigation area: Alplager (2 130 m; 1978-2010) and Baityk (1 580 m; 1914-1979). The station data were primarily used to  
25 calibrate and validate the downscaling method. For reanalysis, the NCEP/NCAR datasets were selected (Kalnay et al., 1996). Simulations of scenarios A1B, B1, and A2 (IPCC, 2007) were performed by the ECHAM5/MPI-OM coupled atmosphere-ocean model (Röckner et al., 2003). On the basis of reanalyse data (NCEP data 1948-2010) and future scenario simulations (ECHAM5 data 2011-2050) statistical downscaling methods were used to link the large scale climate information to local station data (Benestad, 2004; Benestad et al. 2007). For this study, we referred to already existing simulations so the scenarios  
30 are not up to date. However, for our purpose, in particular for the development of glacial lakes, these scenarios are sufficient.

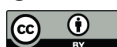

Furthermore, glaciological and hydrological data were used to calibrate and validate the model. For this purpose, mass balance data of the proximal Golubina glacier (1981-1994) (WGMS, 2017) were involved, as there are no such data for Adyngine glacier itself. In this period the annual, winter and summer mass balance was measured. Especially the winter mass balance is beneficial for the calibration of GERM.

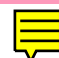

5 In order to estimate the potential area for glacial lake formation, the data on glacier bed topography acquired by ground penetrating radar (GPR) were used. The DEM data for the glacier surface were consulted from Shuttle Radar Topography Mission (SRTM) with a resolution of 30m (Farr et al. 2007). The combined information on future glacier extent and topography of the exposed area were analysed in GIS by determining flow directions and identifying sinks (= overdeepenings).

## 10 2.4 Hazard assessment

Presented lake outburst hazard assessment is qualitative and was adapted to the regional distinctive features, i.e. dry climate, common occurrence of buried ice, permafrost. We based the assessment procedure on our knowledge gained through fieldwork in the region, focused especially on hydrological systems of proglacial lakes. The specificity of the region is the origin of lakes – the most common type is a lake formed in an intramorainic depression (Table 1). Many lake hazard evaluations are based on cases of moraine dams with a distinct morphometry. However, this type of lake does not occur that frequently in the region, representing only 2 % of the potentially dangerous ones (S. Erokhin, personal communication). Nevertheless, inspiration for this assessment is drawn from Allen et al. (2016), Frey et al. (2010), and Huggel et al. (2004). We hold the opinion that hazard assessments based solely on remotely sensed data are appropriate when applied over a large area and as a first step. However, at least for lakes labelled as potentially dangerous, additional evaluation which would include on-site research needs to be carried out.

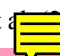

In this paper, overall hazard is introduced as a combination of a lake's (geomorphological) susceptibility to burst and cause flooding, and the presence of possible triggers that have a capacity to cause an outburst. To assess lake susceptibility, the following parameters were selected and a simple qualitative rating suggested (Table 3):

25 *Lake volume* – involves the size of a lake and volume of retained water. Although hazard does not increase proportionally with lake size, a larger volume generally means higher hydrostatic pressure on a dam and greater potential to cause damage. The thresholds are set according to information on GLOF cases in Kyrgyzstan.

30 *Lake type* – is primarily connected to the stability of a dam. The material forming a dam (or a depression in which a lake exists) has varying characteristics and behaviour in relation to water. Rockstep is considered the most stable, as water usually has a minor effect on it. However, when covered with loose morainic material left behind a retreating glacier, this part of a dam is then prone to erosion, piping, and is less stable overall. Interaction of a lake with an ice dam results in even higher risks – ice



melting due to heat transfer from water, hydrostatic pressure on the ice dam can lead to its uplift, causing lake drainage; shear stress within the glacier body may trigger crack formation.

Another parameter influencing lake stability is *ice contact*. A lake in direct contact with a glacier is considered more dangerous than one at a distance, as it is strongly affected by glacier behaviour. Its evolution and morphological changes can be dynamic as the glacier retreats, advances or disintegrates.

A lake's hydrological regime is represented by one parameter – *drainage type*, with only two options – surface or subsurface drainage. It is the limited (or changing) capacity of a subsurface channel which makes lakes with this type of drainage more dangerous, as such lakes are prone to filling when inflow is increased. Accumulated water can then be released rapidly due to channel enlargement under higher hydrostatic pressure. A surface channel, in comparison, regulates the lake water level naturally and maintains its hydrological balance.

*Growth possibility* of a lake depends on lake basin characteristics and the presence of ice that can melt. Lakes with terminated expansion possibilities are considered more stable than those which can enlarge for some reason.

Table 3. Lake susceptibility parameters and rating. The scheme on the right shows possible combinations of parameters' rating and the resulting susceptibility. Note that this simplifying table serves as guidelines to susceptibility estimate. Even medium total susceptibility means a lake is dangerous, may burst and cause damage.

| Parameter                     |                           | Rating | Parameters rating |   |   |   |   | Result |
|-------------------------------|---------------------------|--------|-------------------|---|---|---|---|--------|
| Lake volume [m <sup>3</sup> ] | < 50 000                  | low    | H                 | H | M | M | M | H      |
|                               | 50 000-500 000            | medium | H                 | H | M | M | L | H      |
|                               | > 500 000                 | high   | H                 | H | M | L | L | H      |
| Lake/dam type                 | Rock step                 | low    | H                 | M | M | M | M | H      |
|                               | moraine-rock, moraine dam | medium | H                 | M | M | M | L | H      |
|                               | intramorainic depression  | medium | H                 | M | M | L | L | H      |
|                               | ice                       | high   | H                 | M | L | L | L | H      |
| Lake drainage                 | surface                   | low    | H                 | L | L | L | L | M      |
|                               | subsurface                | medium | M                 | M | M | M | M | M      |
| Glacier contact               | no                        | low    | M                 | M | M | M | L | M      |
|                               | yes                       | medium | M                 | M | L | L | L | L      |
| Growth possible               | no                        | low    | M                 | L | L | L | L | L      |
|                               | yes                       | medium | L                 | L | L | L | L | L      |

Determination of the degree to which a lake is susceptible to outburst is followed by assessment of potential triggers. The means to determine whether the trigger has a potential to cause outburst of the specific lake or not, may be distant (VHR satellite image, DEM), as is the case of the first group of triggers (Table 4), or on-site, as is necessary e.g. for inner dam stability or subsurface channel functioning.





The fall of mass into a lake is one of the most common triggers of lake outburst (Emmer and Cochachin, 2013; Ding and Liu, 1992; Falatkova, 2016), resulting in an impact wave which overtops or destabilises the dam. Following a widely used procedure, the distance between a lake and a slope and slope steepness are the parameters determining the trigger potential (Alean, 1985; Fischer et al., 2012; Noetzli et al., 2003). In the case of calving, a lake's contact with a cliff-like glacier terminus is a crucial condition.

Development and stability of a glacial lake can be affected by melting of buried ice and related thermokarst processes. During stagnation of a debris-covered glacier, an ice-cored moraine dam can be formed. These cores present a weak point in a dam, as their ablation changes a dam's inner structure (Richardson and Reynolds, 2000).

Not only landslide dams are prone to failure caused by piping. Cases of GLOF due to piping in moraine dams were observed as well (Xu, 1988). Moraines consist of unconsolidated heterogeneous material and therefore may be prone to seepage and internal erosion (piping) as a conduit grows and a dam is weakened (Awal et al., 2011).

Another dam stability-decreasing phenomenon – earthquake, was confirmed as a primary trigger of several lake outbursts (Clague and Evans, 2000; Lliboutry et al., 1977).

In the case of a lake not having a surface drainage and meltwater from a glacier being routed into the lake, there is the potential of significant hydrostatic pressure increase in times of higher melt rates of snow or ice. A sudden air temperature rise may therefore cause disturbance of the lake hydrological balance with possible consequences for dam stability. Increase of hydrostatic pressure may also be caused by blockage of a subsurface channel, which is a very unpredictable and still rather poorly understood phenomenon. Monitoring of changes in lake morphometry due to frequent sliding of lake walls or the hydrological regime of a lake can serve as a tool for determining channel blockage potential.

Change of lake outburst hazard is a complex situation, resulting from interaction of geomorphological processes and the behaviour of the glacio-hydrological system. Development of englacial and subsurface routing of meltwater is especially crucial, yet difficult to determine, and beyond the scope of this paper. The presented estimate of hazard change is linked to climatic changes (rising MAAT) only, and involves impacts accompanying deglaciation that were observed in other mountain ranges, such as glacier retreat, altered glacier melt rates, also slope instability (debudding effect), permafrost degradation, or buried ice melting (Allen et al., 2016; Frey et al., 2010; Haeberli et al., 2016). The general assumptions of future climatic conditions, glacier retreat, and altered melt rates are supported by the glacier mass balance model (Sect. 3.3).

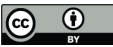

Table 4. Triggers with potential to cause outburst and their description.

| Trigger                       | Potential to cause outburst                                                                                    |                                                                                                                          |
|-------------------------------|----------------------------------------------------------------------------------------------------------------|--------------------------------------------------------------------------------------------------------------------------|
|                               | not present or very low                                                                                        | present                                                                                                                  |
| Fall of mass into lake        | Ice avalanche<br>average slope lake-steep glacier parts* below 17°                                             | average slope lake-steep glacier parts* over 17°                                                                         |
|                               | Landslide/rockfall<br>no proximal** slope over 30°                                                             | proximal** steep slope - unconsolidated material (over 30°) or rockwall (over 50°)                                       |
|                               | Calving<br>no contact with glacier                                                                             | contact with glacier (drifting ice blocks, crevassed front)                                                              |
| Inner dam stability           | Buried ice melting<br>no buried ice detected, no surface signs in lake's surroundings                          | buried ice detected/surface signs observed in lake's proximity                                                           |
|                               | Seepage/piping<br>dam not prone to piping (rockstep, ice dam)                                                  | water getting to surface at the airy side of dam, moisture marks at airy side of dam, sediment accumulation near spring  |
| Hydrostatic pressure increase | Earthquake<br>region with very low seismic activity                                                            | considerable seismic activity in the region                                                                              |
|                               | Increased inflow<br>stable surface outflow regulating lake level, lake not hydrologically connected to glacier | lake without surface drainage, glacier meltwater inflow                                                                  |
|                               | Subsurface channel blockage<br>lake drained by surface channel                                                 | lake drained by subsurface channel, channel varying capacity, previous lake filling-up without increased inflow observed |
|                               | Upper lake outburst<br>no lake (of substantial volume) upstream                                                | presence of potentially dangerous lake upstream                                                                          |

\* avalanche starting zone steepness: polythermal glacier over 25°, cold-based glacier over 45° (Alean, 1985)

\*\*average slope trajectory over 14° (Noetzli et al., 2003)

5 3 Results

3.1 Past glacier development

The terminus position of the investigated glacier has changed significantly since the 1960s. Over the past five decades, the furthestmost part of the glacier terminus retreated approx. 630 m (Fig. 2). Adygine glacier became disconnected from its smaller western branch probably during the 1950s. According to an aerial image taken in 1962, the tongue was divided into two parts by a resistant rock outcrop. The larger western part reached the rock riegel at an elevation of approx. 3 540 m a.s.l. (close to the current Lake 2 drainage channel); the narrower eastern tongue bypassed the outcrop reaching 100 m lower, to 3 450 m a.s.l. (currently the position of Lake 1). In the following decades, both parts retreated at an average rate of 8 m a<sup>-1</sup> in 1962-1988 and 14 m a<sup>-1</sup> in 1988-2012. Currently, there is no elevation difference between the western and eastern parts of the terminus (3 640 m a.s.l.). At present, the terminus retreat rate has similar values to the earlier 1962-1988 phase, slightly over 8 m a<sup>-1</sup>. A significant recession period in recent years was recorded between 2013 and 2015, when the terminus retreated some 10-15 m per year. Positional differences of retreat rate are linked to variability of glacier bed topography (rock outcrops) and to heat transfer with meltwater (contact with glacial lake). Ice thickness change at the tongue monitored between 2007 and 2012 at transversal profiles (Fig. 2) showed an average ice ablation of 1.5 at profile A and 2 m a<sup>-1</sup> at profile B. The highest ablation was recorded between 2007 and 2008, namely 2.5 m a<sup>-1</sup> (A) and 2.6 m a<sup>-1</sup> (B).

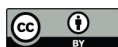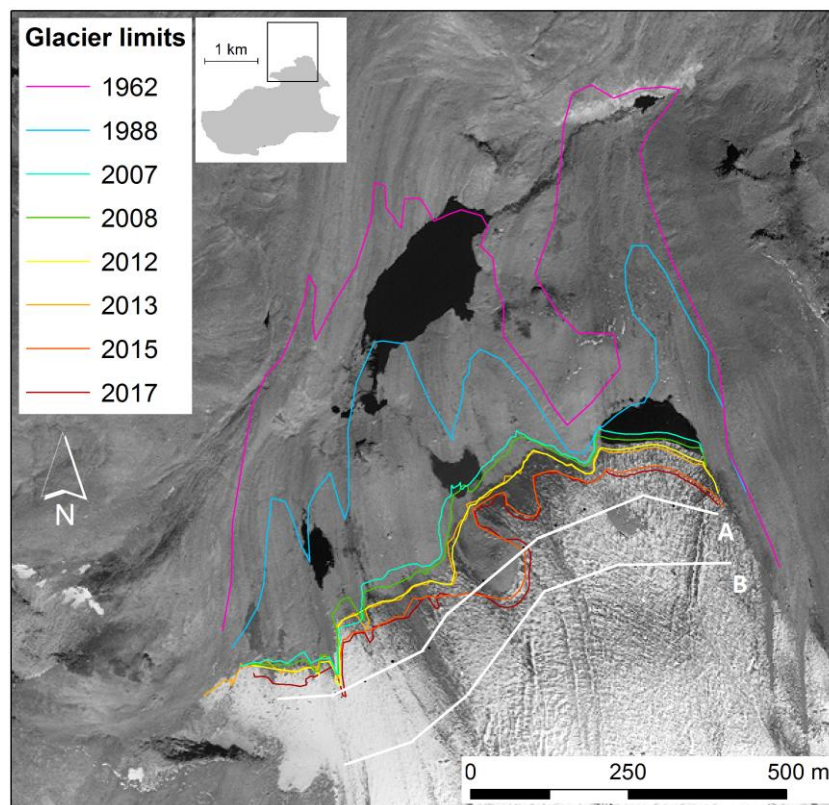

Figure 2. Retreat of a glacier tongue Adygine since 1962. White solid line represents ablation profiles A and B. Base image: Worldview-2, 2011.

## 5 3.2 Formation and development of the lakes

There are numerous lakes of varying size, type, and stage of development at the study site. They form a three-level cascade and at least some of the lakes are hydrologically connected.

### 3.2.1 Lake 1

The first part of the cascade is formed by about a dozen thermokarst lakes, situated on a large morainic platform (passive rock glacier) at an elevation of approx. 3 450 m. The largest of them (Lake 1; Janský et al., 2010) is situated directly below a rock riegel in a depression (approx. 200 000 m<sup>3</sup>), which was revealed when the eastern part of the tongue receded. The exact year when the depression filled with water is not clear. According to our knowledge of the drainage system, it was after Lake 2 developed and started supplying Lake 1 with a larger volume of meltwater (probably during the late 1980s). This intramorainic lake is not permanent, as the inflow exceeds the outflow channel capacity only during an ablation season. The



lake level fluctuates significantly during the course of a day (leading to volume changes between 10 000 and 15 000 m<sup>3</sup>), caused by limited capacity of subsurface outflow channels. Besides surface water intake, water is probably routed here by seepage from Lake 2 and Lake 3. There have been changes in morphometry of the basin within recent years, as sliding of unconsolidated material from the basin walls was observed. The part close to the lake drainage has changed in particular recently, extending the basin in a north-easterly direction.

### 3.2.2 Lake 2

Lake 2, the largest lake of the site, began forming in about 1960, after the western glacier tongue retreated behind a rock riegel at 3 540 m a.s.l. Since then, the lake area has extended, together with further terminus recession, reaching 32 700 m<sup>2</sup> in 2005 (first on-site survey). In the second half of the 1990s, the lake lost direct contact with the glacier and, as a result, the lake ceased to grow. Lake volume is regulated by a surface outflow channel eroded in morainic material, covering a rock outcrop. In the last decade, a slight change in the lake area has been recorded, caused by siltation near the inflow. In 2017, the lake area was 30 900 m<sup>2</sup>, and the maximal lake depth has decreased as well since the beginning of monitoring (from 22.2 m in 2008 to 21.3 m in 2015). The lake volume changed accordingly from 208 000 m<sup>3</sup> (2008) to about 195 000 m<sup>3</sup> (2015). Geophysical sounding confirmed the presence of buried ice in the western part of the lake dam area – the remnants of a glacier tongue formerly bypassing a rock outcrop, now covered by 8–10 m of moraine material. The overall thickness of ice exceeds instrument depth range, i.e. ice is over 50 m thick. Seepage has been detected at the outflow (probably through fissured rock bar and moraine), and at the western dam part linked to the moraine-bed interface and also likely to the buried ice englacial system.

### 3.2.3 Lake 3 and newly emerging lakes

During the last 12 years, several lakes have formed in the proximity of the retreating glacier terminus, filling rather shallow depressions. The lakes' development is closely linked to the amount and routing of glacier meltwater, as well as to basin stability. Our data suggest the importance of direct contact with the terminus, as only such lakes showed an increase in area. Lake 4 is an example of one which was enlarging slightly only until it lost contact with the glacier in 2011/12. Most lakes formed, enlarged or remained stable over a period of several years, and finally drained by subsurface routes (for detailed information on lakes' morphometric changes see Table A1). An exception is Lake 6, which seemed stable over the monitoring period, only until it suddenly drained in 2015, but was filled again the following year. The recently exposed area after glacier regression is underlain by stagnant buried ice. For this reason, the probable explanation of lake sudden drainage is linked to the melting of the ice and/or formation of englacial channels below the lake.

Although these proglacial lakes are very unstable, the hazard they pose is negligible, as only a small amount of water (up to 4 000 m<sup>3</sup> in Lake 4 and Lake 6) can be retained in such shallow depressions. Lake 3 is an exception; the easternmost lake is in



direct contact with the glacier and is growing annually. It is situated in a deep basin - in 2007 a bathymetric survey recorded a maximum depth of 3.7 m; in 2017, as the lake enlarged, it was over 14 m. Besides the climate-driven glacier retreat, the lake has been growing due to increased glacier melting, caused by heat transfer between lake water and ice. The lake expanded from 5 710 m<sup>2</sup> in 2007 to 8 830 m<sup>2</sup> in 2012. In the past few years, the growth accelerated, leading to a lake area of 16 020 m<sup>2</sup> in 2017 (Fig. 3). Shortly after its formation, the lake had a partly surface outflow. However, soon the drainage switched to subsurface channels. Currently, during high lake water level, water overflows the dam. However, this minor surface drainage submerges under the surface after 5-6 metres. Geophysical survey revealed a similar dam structure to that of the Lake 2 dam – rock outcrop covered by thick moraine forms the western part of the dam, and the eastern part consists of stagnant ice buried by morainic material – remains of the eastern glacier tongue. As the volume of the retained water increases rapidly (7 800 m<sup>3</sup> in 2007, 29 300 m<sup>3</sup> in 2012, and 106 000 m<sup>3</sup> in 2017), this recently insignificant lake has become the centre of attention.

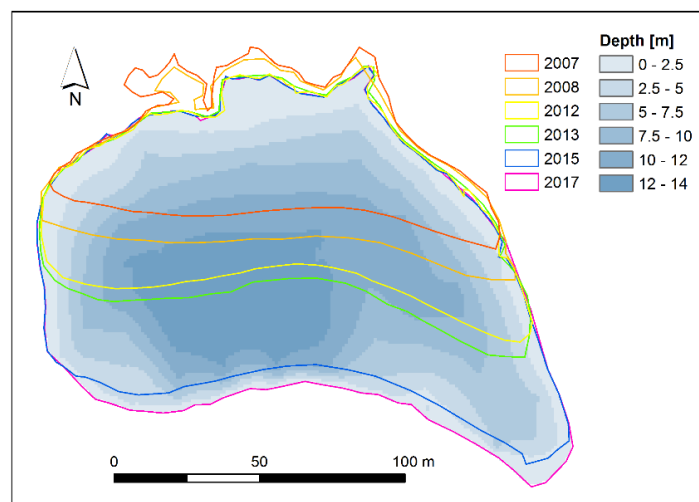

Figure 3. Bathymetric map and area changes of Lake 3 between 2007 and 2017. The lake depth data were gained during field survey carried out in 2017.

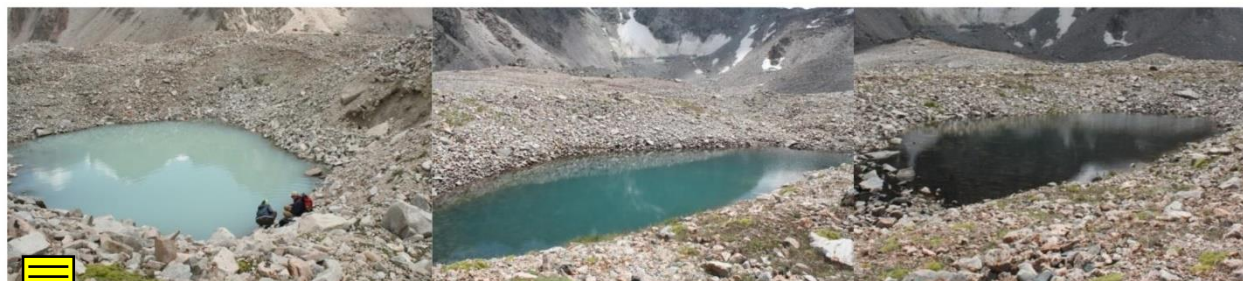

Figure 4. Thermokarst lakes of varying age in Adygine moraine complex. Photo: K. Falatkova (2017)





At the level of Lake 1 there are several small glacial lakes of varying age (Fig. 4), most of them formed by thermokarst processes. As these lakes have only a very small volume and no significant area development was observed, a closer investigation from outburst hazard point of view was not carried out. However, a few lakes situated in the youngest generation of a moraine recently uncovered the basin sides formed by buried glacier ice (Fig. 4, left). These lakes are expected to further develop in future, either enlarge or empty through newly opened drainage channels.

### 3.3 Expected future site conditions

According to all scenarios, the rise of air temperature in the area is very likely in future decades, with estimated higher temperature increase in spring and summer and a moderate temperature increase in autumn and winter. The prediction of annual precipitation shows a reduction under all three scenarios. Especially summer and autumn depicts a decrease of precipitation. Winter and spring displays a minor reduction or even a slight increase of precipitation totals (for winter under A2, for spring under B1). That is expected to result in continuing negative mass balance of the glacier Adygene, its recession, and altered runoff regime.

After application of a Gaussian 10-year low pass filter, the mass balance of Adygene glacier is negative for all the modelled period (Fig. 5a). Scenario A1B shows a less negative mass balance (-500 to 0 mm w.e.) between 2015 and 2035 compared to the other scenarios. In this period, scenario A2 has the highest variation with mass balance reaching values from -1 300 to -500 mm w.e. After 2033 all scenarios illustrate a significant negative trend, especially scenario A1B showed a steep decline with a gradual recovery after 2045. There is a rather distinctive breakpoint in number of parameters at the beginning of the 2030s, which seem to accelerate the glacier area shrinkage.

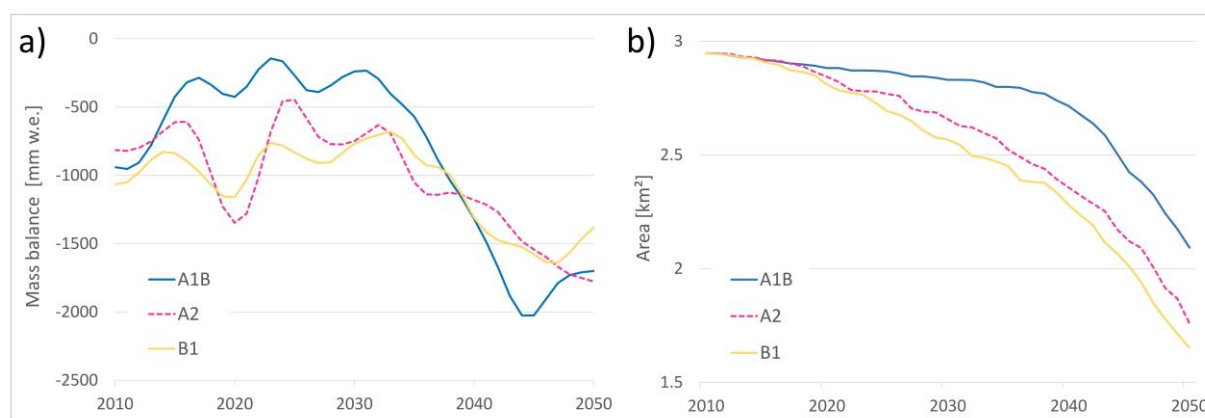

Figure 5. a) Glacier mass balance and b) glacier area evolution modelled according to scenarios A1B, A2, and B1 for the period 2010-2050. Data smoothed with 10-year low pass filter.

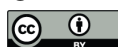

Due to the negative mass balances (Fig. 5a), all scenarios expect a reduction of the glacier area. Under the scenario A1B, the glacier area is reduced only slightly at the beginning (2015-2035) in comparison with the other two scenarios (Fig. 5b). After 2035, scenario A1B shows accelerated area shrinkage. All three scenarios predict a significant glacier area decrease by 2050, specifically, leaving 73.2 % (A1B), 62.3 % (A2), and 55.6 % (B1) of the 2012 glacier extent. The model output indicates (Fig. 6), that under scenario B1 the glacier will disintegrate into three parts, one major and two small ones. Similarly, scenario A2 expects separation of one small part. Due to the modelled glacier retreat, there is a potential for new lakes to form in the exposed area. Under scenario A1B, three new lakes with total area of ca 0.1 km<sup>2</sup> can emerge, scenario A2 present a potential for seven new lakes with total area of 0.13 km<sup>2</sup> to form. Scenario B1 exhibits the highest modelled glacier retreat and the exposed terrain has a potential for eleven new lakes with a total area of 0.17 km<sup>2</sup>.

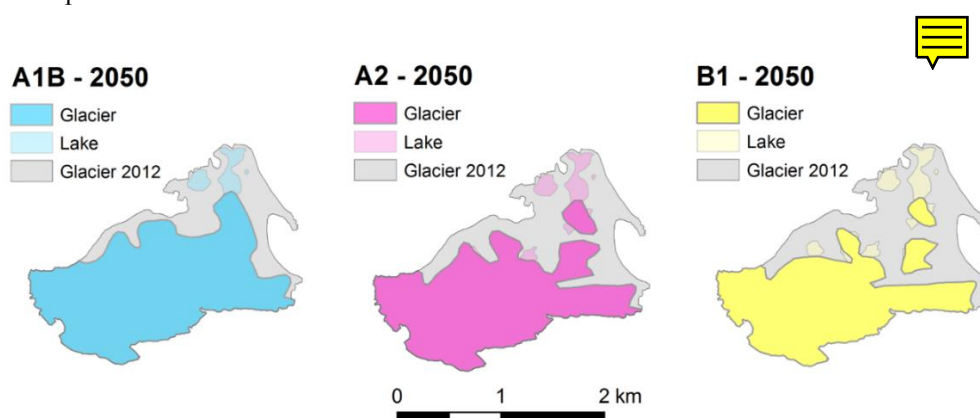

Figure 6. Modelled future glacier extent and possible areas for lake formation for the year 2050 under scenarios A1B, A2, and B1.

Total runoff from the site is expected to rise according to scenarios A1B and A2, increasing by 19.7 % and 25 % respectively, between 2010 and 2050 (Fig. 7a). The scenario B1 expects a rise with peak around 2020, followed by decline and overall stagnation, resulting in no significant trend in the modelled period.

Comparing the runoff evolution for separate months, the most pronounced positive trend can be seen in the early period of ablation and also in the late one, specifically April, May, and October. Slight increase in runoff is also expected in June and September. The peak of ablation season, July and August, shows no significant alteration. These results coincide with the general hypothesis of future prolongation of an ablation season, its start shifted to earlier date and ending to later one. This is because rise of air temperature won't be distributed uniformly over the year. The change in runoff in May is the most striking of all (Fig. 7a). Around 2010 runoff in May was two to three times lower compared to June, however, at the end of the modelled period it reached the level of June 2010.



When we separate total runoff into its two main components: melt from snow and from ice (Fig. 7b), we can see a significant shift of the snow component. The peak runoff from melting snow in the first decade of modelled period (2010-2020) was in mid-June, whereas in the last decade (2040-2050) it is expected to occur in mid-May. This will also result in slightly earlier start of glacier ice melting as the snow cover will melt away and expose the bare ice.

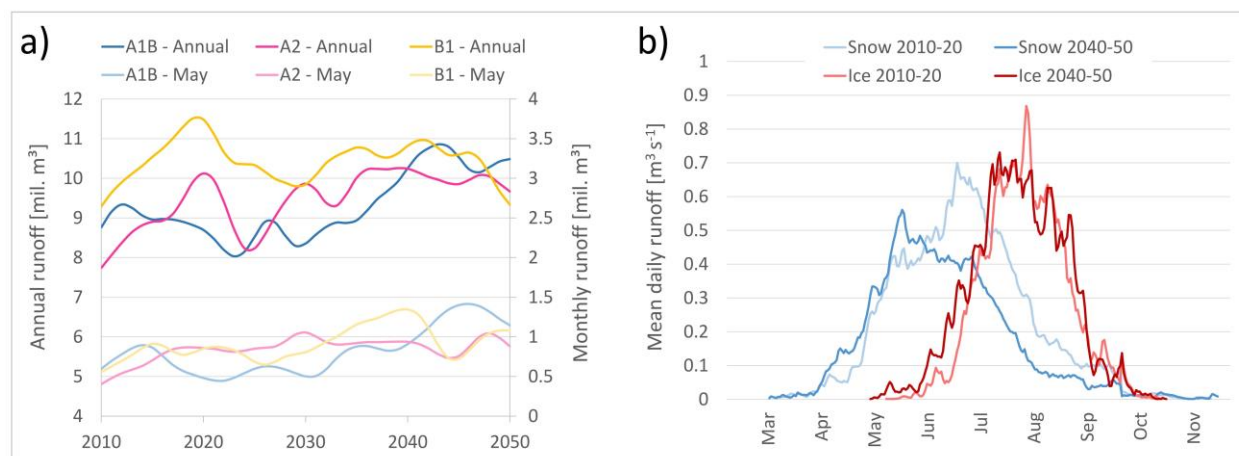

Figure 7. a) Development of total yearly runoff and monthly runoff for May between 2010 and 2050. Data smoothed with 10-year low pass filter. b) Mean of all scenarios for daily runoff from snow and ice in periods 2010-20 and 2040-50.

### 3.4 Hazard assessment and its expected change

Overall susceptibility of the studied lakes is summarised in Table 5. Lakes 1 and 3 were marked as having medium susceptibility, whereas the largest lake of the site, Lake 2, is considered as being less inclined to cause a flood. Several areas were determined as a potential source of mass movement that could reach the lakes (Fig. 8). These are mainly the steep upper part of the glacier with visible deformations and cracks and also the eastern lateral moraine with buried ice. Both surface and subsurface hydrological connections among the lakes show routing of excess water in the case of rapid melting or lake drainage.

As shown by the model projections and also indicated by the position of ELA, the glacier is expected to shrink significantly in the following decades. Sorg et al. (2014) confirm that future hazard is likely to change due to glacier retreat and accompanying signs. South-oriented slopes in particular are most prone to destabilisation, due to rising temperature and the effect of high temperature differences caused by radiation. Our studied site has mostly a northern exposition, however, there are slopes that could be prone to destabilisation.



Table 5. Lakes' susceptibility to cause outburst flood.

| Parameters | Area   | Dam type | Drainage | Ice contact | Growth possibility | Total  |
|------------|--------|----------|----------|-------------|--------------------|--------|
| Lake 1     | low    | medium   | medium   | low         | medium             | medium |
| Lake 2     | medium | medium   | low      | low         | low                | low    |
| Lake 3     | medium | medium   | medium   | medium      | medium             | medium |

5

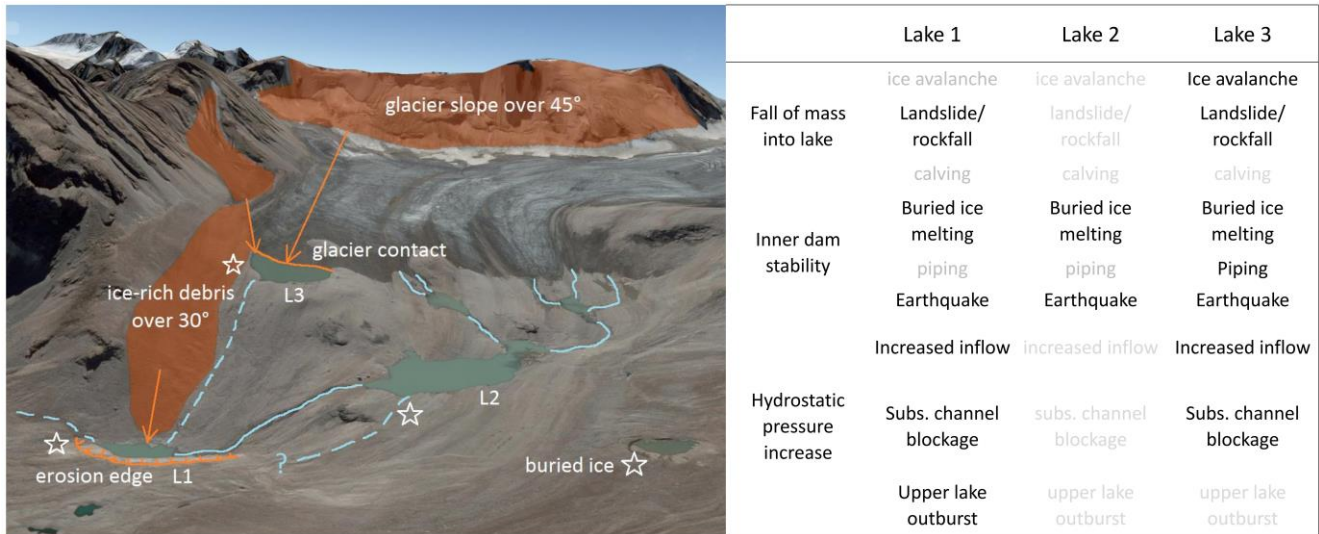

Figure 8. Geomorphological conditions and potential triggers of lake outburst at Adygine complex.

Lake 1 has medium susceptibility to cause flood, mainly due to its origin (intramorainic depression), subsurface drainage, and possibility for enlargement. Outburst can be triggered by a fall of mass from the north-oriented slope of unconsolidated debris which contains buried ice. The weak point is the subsurface drainage channel which leads through stagnant rock glacier. Changes in capacity and, above all, blockage of such a channel would lead to lake filling up and subsequent outburst. That could also be initiated by outburst or overflow of Lake 3. Hazard is expected to increase in the future, due to intensified melting of buried and exposed ice near the lake basin, and destabilised slopes in its vicinity.

Lake 2 has a low susceptibility to cause flood because of its stable surface drainage, distance from the glacier terminus and associated ending of lake basin development. As there are no proximal unstable slopes (only rock outcrops), outburst is not likely to be triggered by a displacement wave from the fall of mass into the lake. A possible weak point is represented by buried ice and water seepage in the western part of the dam that could lead to changes in subsurface drainage network. Hazard change is expected to be negligible in the future, as surface drainage can deal with possible higher inflow and lake stability will not be threatened by unstable slopes.



Lake 3 has medium susceptibility to cause flood, due to its position in contact with the glacier, rather unstable subsurface drainage and potential to grow both in area and depth. Despite the contact with the glacier tongue, calving is not probable. However, the lake is within reach of an ice avalanche from the steep glacier slope and also landslide from adjacent unstable lateral moraine. The eastern part of the dam is prone to failure, due to the presence of buried ice. Overflow of the dam caused by increased inflow from the glacier may lead to progressive dam erosion. Hazard is expected to increase together with increasing lake volume and hydrostatic pressure on the dam. Also, destabilised slopes in the lake's proximity will threaten the lake stability.

Individually, the lakes present a certain threat. Nevertheless, as these lakes are interconnected, the overall hazard of the site should be considered. In this case, a chain reaction is a very probable scenario. The lowest Lake 1 is subjected to changes in its basin morphometry and thus in subsurface drainage channel functioning. In the case of a rapid increase in drainage from Lake 2, or outburst of Lake 3, this lake would be hit. And it is rather unclear how this still-evolving, subsurface-drained basin would react. In regard to similar cases from the region, the lake filling up with subsequent rapid drainage can be expected.

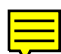

## 4 Discussion

### 4.1 Glacier retreat rate

Although the studied glacier is rather small compared to many glacier bodies in the European Alps, North American Cascade Range or Himalaya-Karakoram, in the dry conditions of Central Asia the glacier is of medium size compared to glaciers in Kyrgyz Ala-Too. This range is one of the outer regions of Tien Shan, situated in the north-west. Glaciers in the western part of Tien Shan are generally rather small. Within the Ala Archa Valley, there are only six glaciers with areas of over 1 km<sup>2</sup>, the largest of them – Golubina – currently has an area of approx. 5 km<sup>2</sup> (Bolch, 2015). Adygine showed the highest mass loss of these six glaciers in Ala Archa with 0.66 m w.e.a<sup>-1</sup> between 1964 and 2010 (Bolch, 2015); the area change (-17.5 %) is also more significant compared to other similar-sized glaciers. However, notably larger area changes were found in the neighbouring Sokuluk Valley, where Niederer et al. (2008) calculated a loss of 22 % for glaciers > 0.5 km<sup>2</sup> between 1963 and 2000, whereas in the same period Adygine retreated by 14.3 %.

The glacier terminus lies at a noticeably higher elevation (3 600 m a.s.l.) compared to other larger glaciers in the main Ala Archa Valley; Golubina and Aksay ending some 250 m and 200 m lower, respectively. In this regard, Adygine is similar to the small glaciers (< 0.5 km<sup>2</sup>) in the main valley. It might be caused by its side position and possible blockage of moisture coming from the north, as even small glaciers within Adygine Valley terminate higher (it seems all are shifted some 200 m higher in Adygine Valley). Although climate is said to be the major driver of glacier changes, topography plays an important role as well. In their study, Li and Li (2014) concluded that, besides climate, the aspect, elevation, and size of a glacier are major characteristics influencing glacier development.





Reliable mass balance measurements of glaciers in Central Asia are fairly scarce, and some long-term observations have been discontinued. In the Ala Archi  chment, there are data of the Golubina glacier mass balance, which show a similar scale of ablation at its tongue (annual balance of -3 200 mm, WGMS). However, the terminus of Adygine glacier lies in a higher elevation band; annual mass balance for Golubina at 3 600-3 700 m a.s.l. is approximately -1 650 mm, which is very similar to our measurements at Adygine. Other glaciers with at least some continuous data on mass balance show even higher rates of ablation in a similar elevation band to the Adygine terminus: for instance Abramov glacier in southern Kyrgyzstan shows values around -4 500 mm (Barandun et al., 2015), Glacier no. 354 located in Ak-Shiirak with a slightly higher terminus position (3 700-3 800 m a.s.l.) has an annual mass balance of about -3 200 mm (Kronenberg et al., 2016).

## 4.2 Model uncertainties and future conditions

Huss et al. (2014) describe in detail the uncertainties that occur in every section of glacier and runoff modelling, therefore, we focus mainly on the input data for the model. GERM was calibrated with summer and winter mass balance data of Golubina glacier from 1981 to 1994. The winter mass balance has no consistent trend of under or overestimation. The modelled summer mass balance slightly overestimates the real conditions from 1981 to 1984 and generally underestimates from 1985 to 1994.

Runoff data from the investigated Adygine drainage basin (1960-1980) were used to validate the results of the glacier mass balance model. The performance of the model is described by the Nash-Sutcliffe efficiency (Nash and Sutcliffe, 1970), which is 0.64 based on monthly mean values. The biases and the uncertainties in the downscaled data, especially the precipitation over complex mountain topography, remain a weakness. Also the lack of DEM from 1960 as well as the glacier area from this time attenuates the accuracy of the calibration of GERM.

Both area and volume of glaciers all over Tien Shan are expected to decrease throughout the 21<sup>st</sup> century (Sorg et al., 2012). Aizen et al. (2007b) as well predict significant glacier degradation linked to ELA shifting to higher altitudes as rising air temperature won't be balanced out by sufficient increase in precipitation totals. Sorg et al. (2014) used the GERM for a glacier and runoff modelling in Chon Kemin valley (Zailiyskiy and Kungey Alatau, Tien Shan), where the glaciers are expected to vanish by 2080 under the more pessimistic scenarios (dry-warm, wet-warm). The future runoff results of Chon Kemin (Sorg et al., 2014) are very similar to those of our study site with 'warm' scenarios expecting peak runoff in 2020s and main change in spring runoff (increase) caused by higher winter precipitation and enhanced snowmelt in spring. A general prediction of runoff change in Tien Shan is possible increase in near future followed by steady decline till the end of the 21<sup>st</sup> century (Sorg et al., 2012). However, different regions of Tien Shan may exhibit varying responses and uncertainties connected to future runoff modelling are still rather high. An advanced state of glacier degradation is presented by Huss et al. (2016), focusing on small-sized glaciers (< 0.5 km<sup>2</sup>) in the Swiss Alps. Runoff from these glaciers has declined since the peak runoff year, which occurred between 1997 and 2004. There is a significant decrease in August runoff which is typical for advanced stage of glacier



runoff decline. Based on a comparison with expected future summer runoff from Adygine glacier, we can estimate that our study glacier is currently near the stage of runoff peak.

### 4.3 Influence of a glacier on lake's development

5 Lake 2 is a typical example of a lake formed when a glacier retreated over a rock step. The lake growth was coupled with glacier recession, until the terminus reached a higher elevation than the lake outflow. After the loss of contact, the lake stabilised and its formation ended. Lake 3 has a similar genesis and is currently in the stage of growth. Thanks to intensive thermal exchange between lake water and ice, the glacier terminus recedes by melting and sometimes even by calving in favour of lake area and depth. As a lake loses contact with a glacier tongue, some development can continue due to melting of residual  
 10 ice in the lake bed or dam. The extent of changes is, however, considerably reduced.

The case of Lake 1, formed in an intramorainic depression, demonstrates the difference in development. The lake's development is not terminated or stabilised after loss of contact with the glacier. Its further evolution is linked to buried ice, its exposure and melting. The depression formed in the 1960s and filled with water two decades later. Yet even today, the lake is subjected to changes of basin morphology and drainage as well. These lakes do not grow to large dimensions like typical  
 15 moraine-dammed lakes (e.g. Tsho Rolpa and Dig Tsho). However, they can hold sufficient volumes of water and cause an outburst flood. In many cases, such lakes are even non-stationary, filling-up only when subsurface channel gets blocked, often in times of increased inflow due to snow or ice melting (Erokhin et al., 2017). The 2012 outburst from Teztor lake, situated in a neighbouring valley at similar altitude as Adygine, serves as an example. When filled, the lake has a volume of 70 000 m<sup>3</sup> and is usually drained by a subsurface channel with a flow rate of a few m<sup>3</sup> s<sup>-1</sup> (Erokhin et al., 2017). Nevertheless, the channel's  
 20 capacity enlarged and the 2012 flood changed into a debris flow of estimated 300 m<sup>3</sup> s<sup>-1</sup>, caused dismay among the capital's inhabitants and material damage of approx. 100 000 USD (Zaginaev, 2013). It is the often variable subsurface drainage, the common presence of buried glacier remnants, and a steep valley full of loose sediments downstream, which make these lakes potentially dangerous.

### 25 4.4 Hazard assessment

Field investigations are necessary to process a realistic assessment of a lake outburst hazard. Many hazard assessments solely utilise remotely gained data. However, it is acknowledged that field survey provides a significant improvement in hazard assessment. McKillop and Clague (2007) mention knowledge of seepage, lake bathymetry and its changes as important information for understanding dam hydraulic conditions. Bolch et al. (2008) highlight subsurface glacier meltwater routing,  
 30 which we see as extremely important as well, together with buried ice distribution. The presented evaluation strategy combines knowledge from the field with benefits of remotely gained data – a good insight into the interaction of site elements (moraines, buried ice, meltwater, glacier, lake, channels, bedrock) and a broader spatial and temporal perspective thanks to airborne



imagery. Remote sensing has proved to be a very useful tool in the field of environmental studies and is the basis for many hazard assessments, e.g. Bolch et al. (2008), Allen et al. (2016), McKillop and Clague (2007), and Huggel et al. (2004).

For a first, large-scale outburst hazard assessment, the possible triggers are often represented by a fall of mass into a lake (e.g. Allen et al., 2016). This trigger (including ice avalanche, landslide, and rockfall) is easy to assess. Evaluation is based solely on a relative terrain elevation at the site, which can be derived from a DEM/DTM. The presented procedure, on the contrary, aims to encompass all trigger factors that could have the capacity to lower dam's or lake basin's stability and cause lake drainage. However, there are still some limitations to a full understanding of the varying mechanisms of lake outbursts. We did not include permafrost degradation as a separate trigger, but we consider it one of the main factors which can increase the hazard in future, as presented for the Alps by Haeberli et al. (2016). The lower part of the site is situated at an altitude of 3500 m a.s.l., which is considered the current interface between continuous and discontinuous permafrost in Northern Tien Shan (Marchenko et al., 2007). An earthquake is definitely a phenomenon that can destabilise a structure from unconsolidated material. Although e.g. McKillop and Clague (2007) decided not to include it in their hazard assessment due to low spatial variability, we consider it as an important factor. Several major earthquakes with epicentres in the vicinity of Kyrgyz Ala-Too were reported in the 20th century. The last case was the M7.5 quake near Suusamyrtash in 1992, about 50 km from Adygine. Although increased inflow due to heavy rainfall was reported to cause moraine dam failure (Yamada, 1998), such events are not common in the region. Heavy rains were reported to trigger a debris flow (Zaginaev et al., 2016), but were not connected to lake outburst.

Glacier retreat in our site's case may not lead to new avalanche-starting zones as described by Haeberli et al. (2016), but the rising MAAT could influence the glacier thermal regime and cause a shift of certain parts from cold- to warm-based, and therefore lower friction between the glacier bed and steep ice masses. Areas exposed after glacier recession often consist of unconsolidated material which, if steep, may become a potential starting zone of landslide or debris flow. The already exposed steep slopes may be destabilised due to melting of interstitial ice or, where present, degradation of mountain permafrost (Huggel et al., 2010). Formation of new lakes at higher elevations increases the hazard of the site, due to a possible cascade effect when even a small volume released could trigger the outburst of a lower-lying lake.

To further explain our motivation to incorporate on-site research into hazard assessment, we would like to draw attention to the scarcity of research papers supported with field data from the region of Central Asia. A well-observed site is Lake Merzbacher and its dam, represented by the Southern Inylchek glacier, with the outburst history described by Glazirin (2010). From the latest examples, Narama et al. (2017) studied supraglacial lakes in the Central Tien Shan, focusing on hydrological parameters of these small-sized and often temporary lakes, and Erokhin et al. (2017) compared two outbursts from a non-stationary glacial lake and presented hazards linked to lakes that form in an intramorainic depression. The phenomenon of repeated debris flow activity triggered by glacier meltwater release, was studied by Solomina et al. (1994) using lichonometry,



and recently by Zaginaev et al. (2016) by dendrochronological methods. Such studies are a very welcome contribution to assist in the improved understanding of GLOF-related processes and influencing factors.

## 5 Conclusion

- 5 The presented paper aims to describe the impact of glacier retreat on its forefield, to highlight the differences in evolution and outburst hazard of proglacial lakes, and to promote a more field-based approach to hazard assessment.

Main results concerning the study site:

- The glacier is subjected to  fast recession comparable to other glaciers in Tien Shan, since 1962 it has retreated on average 11.5 m per year. By 2050, it's expected to shrink to 55.6-73.2 % of its 2012 extent.
- 10 - As a consequence, glacier runoff will change in following decades. Specifically, the beginning of ablation season is supposed to occur earlier compared to current situation, and the peak runoff from melting snow will very likely shift from mid-June to mid-May, resulting in slightly earlier start of glacier ice melting.
- A three-level cascade of glacial lakes formed in the glacier forefield with the largest Lake 2 detaining volume of about 200 000 m<sup>3</sup>. However, due to its stable surface drainage and no contact with glacier tongue it terminated its development in  
 15 1990s. Two other lakes have potential to grow, Lake 1 thanks to filling up and melting of buried ice, Lake 3 by further glacier retreat. The latter is currently the most dynamic one, it formed in 2005 and till present it has expanded to volume of 106 000 m<sup>3</sup> and depth of over 14 m.
- Lake 1 and Lake 3 were categorised into medium hazard mainly due to their subsurface drainage and presence of buried ice in their vicinity. Despite the large size, outburst hazard of Lake 2 was assessed as low. Destabilisation of steep slopes, exposure  
 20 and melting of buried ice, and changes in glacier runoff may further deteriorate stability of Lake 1 and Lake 3 and lead to increase of the outburst hazard in future.

- A very similar development of other glacier complexes in this region is expected, runoff peak occurring at present or near future, gradual melting of buried ice, and formation of new lakes. This will result in new outburst hazards that can arise in a  
 25 relatively short time. One of the main outputs of the study is an analysis of lakes' development dynamics, which indicate lake's potential to grow and the related outburst hazard. As we documented, the lake size is not as important a factor in terms of hazard, we would rather emphasize the influence of buried ice (especially in the dry region of Central Asia) and unpredictability of subsurface drainage channels. In terms of future hazard change, we would like to draw attention to the influence of glacier runoff. Expected extension of ablation season and related activity of glacial lakes may lead to increased outburst hazard. The  
 30 prolonged period of melting season in relation to buried ice will result in higher potential for alteration of hydrological network



of drainage channels. Further research should be dedicated to hydrological connections in moraine-glacier complexes and interactions of subsurface channels with buried ice, as there is still insufficient understanding of these processes. Such research would indeed increase the reliability of lake hazard assessments.

5     *Competing interests.* The authors declare that they have no conflict of interest.

*Author contribution.* KF, MŠ, and BJ carried out the field work and processed the obtained data. KF designed the hazard assessment, produced the figures, and wrote the manuscript with contribution of AN for the model part. AN and WS ran the glacier evolution model. All authors contributed to improvement of the paper.

10     *Acknowledgements.* Our great thanks belong to Sergey Erokhin for providing support essential for successful field work, valuable material and consulting of the hazard situation in Kyrgyz Ala-Too. We thank Zbynek Engel for providing information on glacier ice thickness, and Vitalii Zaginaev for reliable help with field work activities. We also thank Stefan Reisenhofer for performing the downscaling, Hermann Häusler for valuable consultation, and Matthias Huss for providing the GERM. The work connected to future development of Adygine glacier was a part of the project EURAS-CLIMPACT.

15

20

25





## Appendix

Table A1. Morphometry of lakes at Adygine site. Lakes 3-9 are the most dynamic ones situated near glacier terminus. A hyphen is used when a measurement was not carried out for the individual lake. Asterisk signifies a value obtained from a satellite image.

|                             | Lake           | 1      | 2       | 3       | 4      | 5     | 6      | 7     | 8     | 9      |
|-----------------------------|----------------|--------|---------|---------|--------|-------|--------|-------|-------|--------|
| Area<br>(m <sup>2</sup> )   | 2007<br>(2005) | 3 390  | 32 700  | 5 710   | 3 230  | 3 230 | 3 350  | 1 860 | 0     | 0      |
|                             | 2008           | -      | 31 900  | 7 030   | 3 680  | 1 580 | 3 410  | 1 910 | 0     | 0      |
|                             | 2012           | -      | -       | 8 800   | 5 100  | 740   | 3 800  | 1 280 | 1 130 | 0      |
|                             | 2013           | -      | -       | 9 870   | 4 870  | 0     | 3 405  | 0     | 558   | 0      |
|                             | 2015           | -      | 31 700  | 14 880  | 4 540  | 0     | 0      | 0     | 0     | 1 540  |
|                             | 2017           | 2 700* | 31 900* | 16 020  | 4 200* | 0     | 2 700* | 0     | 0     | 1 150* |
| Length<br>(m)               | 2007           | 109    | -       | 161     | 90     | 120   | 106    | 85    | 0     | 0      |
|                             | 2008           | -      | 364     | 166     | 92     | 94    | 113    | 85    | 0     | 0      |
|                             | 2012           | -      | -       | 168     | 105    | 54    | 113    | 65    | 60    | 0      |
|                             | 2013           | -      | -       | 174     | 106    | 0     | 113    | 0     | 67    | 0      |
|                             | 2015           | -      | 390     | 198     | 100    | 0     | 0      | 0     | 0     | 70     |
|                             | 2017           | 110*   | 390*    | 200     | 95*    | 0     | 90*    | 0     | 0     | 50*    |
| Max<br>depth<br>(m)         | 2007<br>(2005) | 4.4    | 21.6    | 3.8     | -      | -     | -      | -     | 0     | 0      |
|                             | 2008           | -      | 22.2    | -       | -      | -     | -      | -     | 0     | 0      |
|                             | 2012           | -      | -       | 10.3    | 2.4    | -     | 3      | 0.5   | 1.8   | 0      |
|                             | 2015           | -      | 21.3    | 12.3    | 2.4    | 0     | 0      | 0     | 0     | -      |
|                             | 2017           | -      | -       | 14      | -      | 0     | -      | 0     | 0     | -      |
| Volume<br>(m <sup>3</sup> ) | 2007<br>(2005) | 6 290  | 208 000 | 7 800   | -      | -     | -      | -     | 0     | 0      |
|                             | 2008           | -      | 206 000 | -       | -      | -     | -      | -     | 0     | 0      |
|                             | 2012           | -      | -       | 29 300  | 3 900  | -     | 3 800  | 500   | 900   | 0      |
|                             | 2015           | -      | 194 000 | 72 000  | 3 630  | 0     | 0      | 0     | 0     | -      |
|                             | 2017           | -      | -       | 106 000 | -      | 0     | -      | 0     | 0     | -      |



## References

- Aizen, V. B., Aizen, E. M., Melack, J. M.: Precipitation, melt and runoff in the northern Tien Shan, *J Hydrol*, 186, 229-251, doi:10.1016/S0022-1694(96)03022-3, 1996.
- 5 Aizen, V. B., Kuzmichenok, V. A., Surazakov, A. B., Aizen, E. M.: Glacier changes in the Tien Shan as determined from topographic and remotely sensed data, *Global Planet Change*, 56(3), 328-340, doi:10.1016/j.gloplacha.2006.07.016, 2007a.
- Aizen, V. B., Aizen, E. M., Kuzmichonok, V. A.: Glaciers and hydrological changes in the Tien Shan: simulation and prediction, *Environ Res Lett*, 2(4), 045019 (doi:10.1088/1748-9326/2/4/045019, 2007b).
- 10 Alean, J.: Ice avalanches: some empirical information about their formation and reach, *J Glaciol*, 31(109), 324-333, doi:10.3189/S0022143000006663, 1985.
- Allen, S. K., Linsbauer, A., Randhawa, S. S., Huggel, C., Rana, P., Kumari, A.: Glacial lake outburst flood risk in Himachal Pradesh, India: an integrative and anticipatory approach considering current and future threats, *Nat Hazards*, 84(3), 1741-1763, doi:10.1007/s11069-016-2511-x, 2016.
- 15 Awan, R., Nakagawa, H., Fujita, M., Kawaike, K., Baba, Y., Zhang, H.: Study on Piping Failure of Natural Dam, *Annals of Disas. Prev. Res. Inst., Kyoto Univ.*, 54B, 2011.
- 20 Barandun, M., Huss, M., Sold, L., Farinotti, D., Azisov, E., Salzmann, N., Usabaliev, R., Merkushev, A., Hoelzle, M.: Re-analysis of seasonal mass balance at Abramov glacier 1968-2014, *J Glaciol*, 61(230), 1103-1117, doi:10.3189/2015JoG14J239, 2015.
- 25 Benestad, R.E.: Empirical-statistical downscaling in climate modeling. *Eos Trans Am Geophys Union*, 85, 417-422, doi:10.1029/2004EO420002, 2004.
- Benestad, R.E., Hanssen-Bauer, I., Førland, E.J.: An evaluation of statistical models for downscaling precipitation and their ability to capture long-term trends, *Int J Climatol*, 27, 649-665, doi: 10.1002/joc.1421, 2007.
- 30 Benn, D. I., Bolch, T., Hands, K., Gulley, J., Luckman, A., Nicholson, L. I., Quincey, D., Thompson, S., Toumi, R., Wiseman, S.: Response of debris-covered glaciers in the Mount Everest region to recent warming, and implications for outburst flood hazards, *Earth Sci Rev*, 114(1), 156-174, doi: 10.1016/j.earscirev.2012.03.008, 2012.
- 35 Bolch, T.: Glacier area and mass changes since 1964 in the Ala Archa Valley, Kyrgyz Ala-Too, northern Tien Shan, *Lёд i Sneg*, 55(1), 28-39, doi: 10.15356/2076-6734-2015-1-28-39, 2015.
- Bolch, T., Buchroithner, M. F., Peters, J., Baessler, M., Bajracharya, S.: Identification of glacier motion and potentially dangerous glacial lakes in the Mt. Everest region/Nepal using spaceborne imagery, *Nat Hazards Earth Sys*, 8(6), 1329-1340, doi: 10.5194/nhess-8-1329-2008, 2008.
- 40 Bolch, T., Peters, J., Yegorov, A., Pradhan, B., Buchroithner, M., Blagoveshchensky, V.: Identification of potentially dangerous glacial lakes in the northern Tien Shan, *Nat Hazards*, 59(3), 1691-1714, doi: 10.1007/s11069-011-9860-2, 2011.
- 45 Chen, Y., Xu, C., Chen, Y., Li, W., Liu, J.: Response of glacial-lake outburst floods to climate change in the Yarkant River basin on northern slope of Karakoram Mountains, China, *Quatern Int*, 226(1), 75-81, doi: 10.1016/j.quaint.2010.01.003, 2010.
- 50 Clague, J. J., Evans, S. G.: A review of catastrophic drainage of moraine-dammed lakes in British Columbia, *Quatern Sci Rev*, 19(17), 1763-1783, doi: 10.1016/S0277-3791(00)00090-1, 2000.



- Ding, Y., Liu, J.: Glacier lake outburst flood disasters in China, *Ann Glaciol*, 16, 180-184, 1992.
- 5 Dussailant, A., Benito, G., Buytaert, W., Carling, P., Meier, C., Espinoza, F.: Repeated glacial-lake outburst floods in Patagonia: an increasing hazard?, *Nat Hazards*, 54(2), 469-481, doi: 10.1007/s11069-009-9479-8, 2010.
- Emmer, A., Cochachin, A.: The causes and mechanisms of moraine-dammed lake failures in the Cordillera Blanca, North American Cordillera, and Himalayas, *AUC Geographica*, 48(2), 5-15, doi: 10.14712/23361980.2014.23, 2013.
- 10 Engel, Z., Sobr, M., Erokhin, S.A.: Changes of Petrov glacier and its proglacial lake in the Akshiirak massif, central Tien Shan, since 1977, *J Glaciol*, 58(208), 388-398, doi: 10.3189/2012JoG11J085, 2012.
- Erokhin, S.A., Zaginaev, V.V.: Forecast of the outburst of mountain lakes in Kyrgyzstan based on their catalogue, Book 2016 Part III, Ministry of emergency situations of Kyrgyz Republic, 2016. (in Russian)
- 15 Erokhin, S.A., Zaginaev, V.V., Meleshko, A.A., Ruiz-Villanueva, V., Petrakov, D.A., Chernomorets, S. S., Viskhadzhieva, K.S., Tutubalina, O.V., Stoffel, M.: Debris flows triggered from non-stationary glacier lake outbursts: the case of the Teztor Lake complex (Northern Tian Shan, Kyrgyzstan), *Landslides*, 1-16, doi: 10.1007/s10346-017-0862-3, 2017.
- 20 Falatkova, K.: Temporal analysis of GLOFs in high-mountain regions of Asia and assessment of their causes, *AUC Geographica*, 51(2), 145-154, doi: 10.14712/23361980.2016.12, 2016.
- Falatkova, K., Sobr, M., Kocum, J., Jansky, B.: Hydrological regime of Adygine Lake, Tien Shan, Kyrgyzstan, *Geografie*, 119(4), 320-341, 2014.
- 25 Farinotti, D., Longuevergne, L., Moholdt, G., Duethmann, D., Mölg, T., Bolch, T., Vorogushin, S., Güntner, A.: Substantial glacier mass loss in the Tien Shan over the past 50 years, *Nat Geosci*, 8(9), 716-722, doi: 10.1038/ngeo2513, 2015.
- Farr, T.G., Rosen, P.A., Caro, E., Crippen, R., Duren, R., Hensley, S., Kobrick, M., Paller, M., Rodriguez, E., Roth, L., Seal, D., Shaffer, S., Shimada, J., Umland, J., Werner, M., Oskin, M., Burbank, D., Alsdorf, D.: The Shuttle Radar Topography Mission, *Rev Geophys*, 45(2), 583-585, doi: 10.1029/2005RG000183, 2007.
- 30 Frey, H., Haeberli, W., Linsbauer, A., Huggel, C., Paul, F.: A multi-level strategy for anticipating future glacier lake formation and associated hazard potentials, *Nat Hazards Earth Sys*, 10(2), 339-352, doi: 10.5194/nhess-10-339-2010, 2010.
- 35 Fischer, L., Purves, R. S., Huggel, C., Noetzli, J., Haeberli, W.: On the influence of topographic, geological and cryospheric factors on rock avalanches and rockfalls in high-mountain areas, *Nat Hazards Earth Sys*, 12(1), 241-254, doi: 10.5194/nhess-12-241-2012, 2012.
- 40 Fujita, K., Sakai, A., Nuimura, T., Yamaguchi, S., Sharma, R. R.: Recent changes in Imja Glacial Lake and its damming moraine in the Nepal Himalaya revealed by in situ surveys and multi-temporal ASTER imagery, *Environ Res Lett*, 4(4), 1-7, 2009.
- 45 Glazirin, G. E.: The reaction of glaciers in west Tien Shan to climate changes, *Zeitschrift für Gletscherkunde und Glacialgeologie*, 32, 33-39, 1996.
- Glazirin, G. E.: A century of investigations on outbursts of the ice-dammed lake Merzbacher (Central Tien Shan), *Austrian J Earth Sci*, 103(2), 171-179, 2010.



- Gorbunov, A. P.: Monitoring the evolution of permafrost in the Tien Shan, *Permafrost Periglac.*, 7(3), 297-298, doi: 10.1002/(SICI)1099-1530(199609)7:3%3C297::AID-PPP223%3E3.0.CO;2-C, 1996.
- 5 Haeberli, W., Schaub, Y., Huggel, C.: Increasing risks related to landslides from degrading permafrost into new lakes in deglaciating mountain ranges, *Geomorphology*, 293, 405-417, doi: 10.1016/j.geomorph.2016.02.009, 2016.
- Haemmig, C., Huss, M., Keusen, H., Hess, J., Wegmüller, U., Ao, Z., Kulubayi, W.: Hazard assessment of glacial lake outburst floods from Kyagar glacier, Karakoram mountains, China, *Ann Glaciol.*, 55(66), 34-44, doi: 10.3189/2014AoG66A001, 2014.
- 10 Hock, R.: A distributed temperature-index ice- and snowmelt model including potential direct solar radiation, *J Glaciol.*, 45, 101-111, doi: 10.3189/S0022143000003087, 1999.
- 15 Huggel, C., Haeberli, W., Kääb, A., Bieri, D., Richardson, S.: An assessment procedure for glacial hazards in the Swiss Alps, *Can Geotech J.*, 41(6), 1068-1083, doi: 10.1139/t04-053, 2004.
- Huggel, C., Fischer, L., Schneider, D., Haeberli, W.: Research advances on climate-induced slope instability in glacier and permafrost high-mountain environments, *Geographica Helvetica*, 65(2), 146-156, doi: 10.5194/gH-65-146-2010, 2010.
- 20 Huss, M., Farinotti, D., Bauder, A., Funk, M.: Modelling runoff from highly glacierized alpine drainage basins in a changing climate, *Hydrol Process*, 22(19), 3888-3902, doi: 10.1002/hyp.7055, 2008.
- Huss, M., Zemp, M., Joerg, P.C., Salzmann, N.: High uncertainty in 21st century runoff projections from glacierized basins, *J. Hydrol.* 510, 35-48, doi: 10.1016/j.jhydrol.2013.12.017, 2014.
- 25 Huss, M., Fischer, M.: Sensitivity of very small glaciers in the Swiss Alps to future climate change, *Frontiers in Earth Science*, 4:34, 1-17, doi: 10.3389/feart.2016.00034, 2016.
- 30 Janský, B., Šobr, M., Engel, Z.: Outburst flood hazard: case studies from the Tien-Shan Mountains, Kyrgyzstan, *Limnologia*, 40(4), 358-364, doi: 10.1016/j.limno.2009.11.013, 2010.
- Kalnay, E., Kanamitsu, M., Kistler, R., Collins, W., Deaven, D., Gandin, L., Iredell, M., Saha, S., White, G., Woollen, J., Zhu, Y., Leetmaa, A., Reynolds, R., Chelliah, M., Ebisuzaki, W., Higgins, W., Janowiak, J., Mo, K.C., Ropelewski, C., Wang, J., Jenne, R., Joseph, D.: The NCEP/NCAR 40-Year Reanalysis Project. *Bull Am Meteorol Soc*, 77, 437-471, doi: 10.1175/1520-0477(1996)077%3C0437:TNYP%3E2.0.CO;2, 1996.
- 35 Kronenberg, M., Barandun, M., Hoelzle, M., Huss, M., Farinotti, D., Azisov, E., Usabaliev, R., Gafurov, A., Petrakov, D., Kääb, A.: Mass-balance reconstruction for Glacier No. 354, Tien Shan, from 2003 to 2014, *Ann Glaciol.*, 57(71), 92-102, doi: 10.3189/2016AoG71A032, 2016.
- 40 Lei, Y., Yao, T., Yi, C., Wang, W., Sheng, Y., Li, J., Joswiak, D.: Glacier mass loss induced the rapid growth of Linggo Co on the central Tibetan Plateau, *J Glaciol.*, 58(207), 177-184, doi: 10.3189/2012JoG11J025, 2012.
- 45 Li, Y., Li, Y.: Topographic and geometric controls on glacier changes in the central Tien Shan, China, since the Little Ice Age, *Ann Glaciol.*, 55(66), 177-186, doi: 10.3189/2014AoG66A031, 2014.
- Li, S., Zhan, H., Lai, Y., Sun, Z., Pei, W.: The coupled moisture-heat process of permafrost around a thermokarst pond in Qinghai-Tibet Plateau under global warming, *J Geophys Res-Earth*, 119(4), 836-853, doi: 10.1002/2013JF002930, 2014.



- Liu, J. J., Cheng, Z. L., Su, P. C.: The relationship between air temperature fluctuation and Glacial Lake Outburst Floods in Tibet, China, *Quatern Int*, 321, 78-87, doi: 10.1016/j.quaint.2013.11.023, 2014.
- 5 Lliboutry, L., Arnao, B. M., Pautre, A., Schneider, B.: Glaciological problems set by the control of dangerous lakes in Cordillera Blanca, Peru. I. Historical failures of morainic dams, their causes and prevention, *J Glaciol*, 18(79), 239-254, doi: 10.3189/S0022143000029610, 1977.
- 10 Marchenko, S. S., Gorbunov, A. P., Romanovsky, V. E.: Permafrost warming in the Tien Shan mountains, central Asia, *Global Planet Change*, 56(3), 311-327, doi: 10.1016/j.gloplacha.2006.07.023, 2007.
- McKillop, R. J., Clague, J. J.: A procedure for making objective preliminary assessments of outburst flood hazard from moraine-dammed lakes in southwestern British Columbia, *Nat Hazards*, 41(1), 131-157, doi: 10.1007/s11069-006-9028-7, 2007.
- 15 Mergili, M., Schneider, J. F.: Regional-scale analysis of lake outburst hazards in the southwestern Pamir, Tajikistan, based on remote sensing and GIS, *Nat Hazards Earth Sys*, 11(5), 1447-1462, 2011.
- 20 Mergili, M., Müller, J. P., Schneider, J. F.: Spatio-temporal development of high-mountain lakes in the headwaters of the Amu Darya River (Central Asia), *Global Planet Change*, 107, 13-24, doi: 10.5194/nhess-11-1447-2011, 2013.
- Narama, C., Kääb, A., Duishonakunov, M., Abdrakhmatov, K.: Spatial variability of recent glacier area changes in the Tien Shan Mountains, Central Asia, using Corona (~ 1970), Landsat (~ 2000), and ALOS (~ 2007) satellite data, *Global Planet Change*, 71(1), 42-54, doi: 10.1016/j.gloplacha.2009.08.002, 2010.
- 25 Narama, C., Daiyrov, M., Tadono, T., Yamamoto, M., Kääb, A., Morita, R., Ukita, J.: Seasonal drainage of supraglacial lakes on debris-covered glaciers in the Tien Shan Mountains, Central Asia, *Geomorphology*, 286, 133-142, doi: 10.1016/j.geomorph.2017.03.002, 2017.
- 30 Nash, J. E., Sutcliffe, J. V.: River flow forecasting through conceptual models part I—A discussion of principles, *J Hydrol*, 10(3), 282-290, doi: 10.1016/0022-1694(70)90255-6, 1970.
- Niederer, P., Bilenko, V., Ershova, N., Hurni, H., Yerokhin, S., Maselli, D.: Tracing glacier wastage in the Northern Tien Shan (Kyrgyzstan/Central Asia) over the last 40 years, *Climatic Change*, 86(1), 227-234, doi: 10.1007/s10584-007-9288-6, 2008.
- 35 Noetzli, J., Hoelzle, M., Haeberli, W.: Mountain permafrost and recent Alpine rock-fall events: a GIS-based approach to determine critical factors, *Proceedings of the 8th International Conference on Permafrost*, 2, 827-832, 2003.
- 40 Pieczonka, T., Bolch, T., Junfeng, W., Shiyin, L.: Heterogeneous mass loss of glaciers in the Aksu-Tarim Catchment (Central Tien Shan) revealed by 1976 KH-9 Hexagon and 2009 SPOT-5 stereo imagery, *Remote Sens Environ*, 130, 233-244, doi: 10.1016/j.rse.2012.11.020, 2013.
- Richardson, S. D., Reynolds, J.M.: Degradation of ice-cored moraine dams: implications for hazard development, *Debris-Covered Glaciers, Proceedings of a workshop*, Seattle, Washington, USA, Sept 2000.
- 45 Roeckner, E., Bauml, G., Bonaventura, L., Brokopf, R., Esch, M., Giorgetta, M., Hagemann, S., Kirchner, I., Kornblueh, L., Manzini, E., Rhodin, A., Schlese, U., Schulzweida, U., Tompkins, A.: The atmospheric general circulation model ECHAM5. Part I: Model description, Rep. 349, Max Planck Institute for Meteorology, 127 pp, 2003.



- Shrestha, A. B., Eriksson, M., Mool, P., Ghimire, P., Mishra, B., Khanal, N. R.: Glacial lake outburst flood risk assessment of Sun Koshi basin, Nepal, *Geomat Nat Haz Risk*, 1(2), 157-169, doi: 10.1080/19475701003668968, 2010.
- 5    Sobr, M., Jansky, B.: The morphometric parameters of glacial lakes in the Bohemian Forest, *Silva Gabreta*, 22, 31-61, 2016.
- Solomina, O. N., Savoskul, O. S., Cherkinsky, A. E.: Glacier variations, mudflow activity and landscape development in the Aksay Valley (Tian Shan) during the late Holocene, *Holocene*, 4(1), 25-31, doi: 10.1177/095968369400400104, 1994.
- 10    Sorg, A., Bolch, T., Stoffel, M., Solomina, O., Beniston, M.: Climate change impacts on glaciers and runoff in Tien Shan (Central Asia), *Nat Clim Change*, 2(10), 725-731, 2012.
- Sorg, A., Huss, M., Rohrer, M., Stoffel, M.: The days of plenty might soon be over in glacierized Central Asian catchments, *Environ Res Lett*, 9(10), 104018, doi: 10.1038/nclimate1592, 2014.
- 15    Wang, X., Siegert, F., Zhou, A. G., Franke, J.: Glacier and glacial lake changes and their relationship in the context of climate change, Central Tibetan Plateau 1972–2010, *Global Planet Change*, 111, 246-257, doi:10.1016/j.gloplacha.2013.09.011, 2013.
- 20    Wang, L., Li, Z., Wang, F., Edwards, R.: Glacier shrinkage in the Ebinur lake basin, Tien Shan, China, during the past 40 years, *J Glaciol*, 60(220), 245-254, doi: 10.3189/2014JoG13J023, 2014.
- WGMS: Fluctuations of Glaciers Database, World Glacier Monitoring Service, Zurich, Switzerland. Online access: <http://dx.doi.org/10.5904/wgms-fog-2017-10>, 2017.
- 25    Xu, D.: Characteristics of debris flow caused by outburst of glacial lake in Boqu river, Xizang, China, 1981, *GeoJournal*, 17(4), 569-580, doi: 10.1007/BF00209443, 1988.
- Yamada, T.: Glacier lake and its outburst flood in the Nepal Himalaya, Data Center for Glacier Research, Japanese Society of Snow and Ice, Tokyo, 1998.
- 30    Zaginaev, V.: The Teztor lake outburst event (northern Tien-Shan). Monitoring, forecasting of hazardous processes and phenomena in the territory of the Kyrgyz Republic, Ministry of Emergency Situations of the Kyrgyz Republic, 10th ed., 563-570, 2013.
- 35    Zaginaev, V., Ballesteros-Cánovas, J. A., Erokhin, S., Matov, E., Petrakov, D., Stoffel, M.: Reconstruction of glacial lake outburst floods in northern Tien Shan: Implications for hazard assessment, *Geomorphology*, 269, 75-84, doi:10.1016/j.geomorph.2016.06.028, 2016.
- 40    Zhang, G., Yao, T., Piao, S., Bolch, T., Xie, H., Chen, D., Gao, Y., O'Reilly, C.M., Shum, C.K., Yang, K., Yi, S.: Extensive and drastically different alpine lake changes on Asia's high plateaus during the past four decades, *Geophys Res Lett*, 44(1), 252-260, doi: 10.1002/2016GL072033, 2017.
- 45    Zhao, Q., Zhang, S., Ding, Y. J., Wang, J., Han, H., Xu, J., Zhao, C., Guo, W., Shangguan, D.: Modeling hydrologic response to climate change and shrinking glaciers in the highly Glacierized Kunma Like River catchment, Central Tian Shan, *J Hydrometeorol*, 16(6), 2383-2402, doi: 10.1175/JHM-D-14-0231.1, 2015.
